# Supplementary material
Source: publisher figshare collection journal article supplement (https://frontiersin.figshare.com/ndownloader/files/25444271)
Supplement: Supplementary file 1 [file 25444271]

**Supplementary Table S1.** Description of landmarks employed in the analyses. A) Landmarks taken on Cv; B) Landmarks taken on Th and Thm; C) Landmarks taken on ThTa, TaTm, Tm, and TmTp; D) Landmarks taken on Tp; and E) Landmarks taken on TS. #: order in which landmarks were digitized. In bold, landmarks on the anterior epiphyses; underlined, landmarks on the posterior epiphyses. NA: neural arch; NS: neural spine; TP: transverse process; R: right; L: left; proximal or distal with respect to the centrum. \* indicate landmarks taken by projecting radiated figures. See Supplementary Figure S2.

A)

| #  | Description                                                        |
|----|--------------------------------------------------------------------|
| 1  | <b>Center of anterior epiphysis</b>                                |
| 2  | <b>Mid-point on dorsal border of anterior epiphysis*</b>           |
| 3  | <b>Mid-point on R lateral border of anterior epiphysis*</b>        |
| 4  | <b>Mid-point on ventral border of anterior epiphysis*</b>          |
| 5  | <b>Mid-point on L lateral border of anterior epiphysis*</b>        |
| 6  | <b>Mid-point between 2 and 3*</b>                                  |
| 7  | <b>Mid-point between 3 and 4*</b>                                  |
| 8  | <b>Mid-point between 4 and 5*</b>                                  |
| 9  | <b>Mid-point between 5 and 2*</b>                                  |
| 10 | Mid-point on the tip of R TP                                       |
| 11 | Maximum posterior curve on the extreme of R TP                     |
| 12 | Most posterior point on the R posterior zygapophysis               |
| 13 | Most posterior point on the L posterior zygapophysis               |
| 14 | In posterior view, mid-point in the intersection between NA and NS |
| 15 | Mid-point on dorsal tip of NS                                      |
| 16 | Maximum posterior curve on the extreme of L TP                     |
| 17 | Mid-point on the tip of L TP                                       |
| 18 | Maximum anterior curve on the extreme of L TP                      |
| 19 | In anterior view, mid-point in the intersection between NA and NS  |
| 20 | Maximum anterior curve on the extreme of R TP                      |
| 21 | <u>Center of posterior epiphysis</u>                               |
| 22 | <u>Mid-point on dorsal border of posterior epiphysis*</u>          |
| 23 | <u>Mid-point on R lateral border of posterior epiphysis*</u>       |
| 24 | <u>Mid-point on ventral border of posterior epiphysis*</u>         |
| 25 | <u>Mid-point on L lateral border of posterior epiphysis*</u>       |
| 26 | <u>Mid-point between 22 and 23*</u>                                |
| 27 | <u>Mid-point between 23 and 24*</u>                                |
| 28 | <u>Mid-point between 24 and 25*</u>                                |
| 29 | <u>Mid-point between 25 and 22*</u>                                |
| 30 | Intersection between radius and anterior border of NS (proximal)*  |
| 31 | Intersection between radius and anterior border of NS (distal)*    |
| 32 | Intersection between radius and posterior border of NS (proximal)* |
| 33 | Intersection between radius and posterior border of NS (distal)*   |

B)

| #  | Description                                                        |
|----|--------------------------------------------------------------------|
| 1  | <b>Center of anterior epiphysis</b>                                |
| 2  | <b>Mid-point on dorsal border of anterior epiphysis*</b>           |
| 3  | <b>Mid-point on R lateral border of anterior epiphysis*</b>        |
| 4  | <b>Mid-point on ventral border of anterior epiphysis*</b>          |
| 5  | <b>Mid-point on L lateral border of anterior epiphysis*</b>        |
| 6  | <b>Mid-point between 2 and 3*</b>                                  |
| 7  | <b>Mid-point between 3 and 4*</b>                                  |
| 8  | <b>Mid-point between 4 and 5*</b>                                  |
| 9  | <b>Mid-point between 5 and 2*</b>                                  |
| 10 | Mid-point on the tip of R TP                                       |
| 11 | Maximum posterior curve on the extreme of R TP                     |
| 12 | Most posterior point on the R posterior zygapophysis               |
| 13 | Most posterior point on the L posterior zygapophysis               |
| 14 | In posterior view, mid-point in the intersection between NA and NS |
| 15 | Mid-point on dorsal tip of NS                                      |
| 16 | Maximum posterior curve on the extreme of L TP                     |
| 17 | Mid-point on the tip of L TP                                       |
| 18 | Maximum anterior curve on the extreme of L TP                      |
| 19 | Most anterior point on the L anterior zygapophysis                 |
| 20 | Most anterior point on the R anterior zygapophysis                 |
| 21 | In anterior view, mid-point in the intersection between NA and NS  |
| 22 | Maximum anterior curve on the extreme of R TP                      |
| 23 | <u>Center of posterior epiphysis</u>                               |
| 24 | <u>Mid-point on dorsal border of posterior epiphysis*</u>          |
| 25 | <u>Mid-point on R lateral border of posterior epiphysis*</u>       |
| 26 | <u>Mid-point on ventral border of posterior epiphysis*</u>         |
| 27 | <u>Mid-point on L lateral border of posterior epiphysis*</u>       |
| 28 | <u>Mid-point between 24 and 25*</u>                                |
| 29 | <u>Mid-point between 25 and 26*</u>                                |
| 30 | <u>Mid-point between 26 and 27*</u>                                |
| 31 | <u>Mid-point between 27 and 24*</u>                                |
| 32 | Intersection between radius and anterior border of NS (proximal)*  |
| 33 | Intersection between radius and anterior border of NS (distal)*    |
| 34 | Intersection between radius and posterior border of NS (proximal)* |
| 35 | Intersection between radius and posterior border of NS (distal)*   |

C)

| #  | Description                                                          |
|----|----------------------------------------------------------------------|
| 1  | <b>Center of anterior epiphysis</b>                                  |
| 2  | <b>Mid-point on dorsal border of anterior epiphysis*</b>             |
| 3  | <b>Mid-point on R lateral border of anterior epiphysis*</b>          |
| 4  | <b>Mid-point on ventral border of anterior epiphysis*</b>            |
| 5  | <b>Mid-point on L lateral border of anterior epiphysis*</b>          |
| 6  | <b>Mid-point between 2 and 3*</b>                                    |
| 7  | <b>Mid-point between 3 and 4*</b>                                    |
| 8  | <b>Mid-point between 4 and 5*</b>                                    |
| 9  | <b>Mid-point between 5 and 2*</b>                                    |
| 10 | Mid-point on the tip of R TP                                         |
| 11 | Maximum posterior curve on the extreme of R TP                       |
| 12 | In posterior view, mid-point in the intersection between NA and NS.  |
| 13 | Mid-point on dorsal tip of NS                                        |
| 14 | Maximum posterior curve on the extreme of L TP                       |
| 15 | Mid-point on the tip of L TP                                         |
| 16 | Maximum anterior curve on the extreme of L TP                        |
| 17 | Most anterior point on L metapophysis                                |
| 18 | Most anterior point on R metapophysis                                |
| 19 | In anterior view, mid-point in the intersection between NA and NS    |
| 20 | Maximum anterior curve on the extreme of R TP                        |
| 21 | <u>Center of posterior epiphysis.</u>                                |
| 22 | <u>Mid-point on dorsal border of posterior epiphysis*</u>            |
| 23 | <u>Mid-point on R lateral border of posterior epiphysis*</u>         |
| 24 | <u>Mid-point on ventral border of posterior epiphysis*</u>           |
| 25 | <u>Mid-point on L lateral border of posterior epiphysis*</u>         |
| 26 | <u>Mid-point between 22 and 23*</u>                                  |
| 27 | <u>Mid-point between 23 and 24*</u>                                  |
| 28 | <u>Mid-point between 24 and 25*</u>                                  |
| 29 | <u>Mid-point between 25 and 22*</u>                                  |
| 30 | Intersection between radius and anterior border of NS (proximal)*    |
| 31 | Intersection between radius and anterior border of NS (distal)*      |
| 32 | Intersection between radius and posterior border of NS (proximal)*   |
| 33 | Intersection between radius and posterior border of NS (distal)*     |
| 34 | Intersection between radius and anterior border of R TP (proximal)*  |
| 35 | Intersection between radius and anterior border of R TP (distal)*    |
| 36 | Intersection between radius and posterior border of R TP (proximal)* |
| 37 | Intersection between radius and posterior border of R TP (distal)*   |
| 38 | Intersection between radius and anterior border of L TP (proximal)*  |
| 39 | Intersection between radius and anterior border of L TP (distal)*    |

- 40 Intersection between radius and posterior border of L TP (proximal)\*
  - 41 Intersection between radius and posterior border of L TP (distal)\*
- 

D)

| #  | Description                                                                      |
|----|----------------------------------------------------------------------------------|
| 1  | <b>Center of anterior epiphysis</b>                                              |
| 2  | <b>Mid-point on dorsal border of anterior epiphysis*</b>                         |
| 3  | <b>Mid-point on R lateral border of anterior epiphysis*</b>                      |
| 4  | <b>Mid-point on ventral border of anterior epiphysis*</b>                        |
| 5  | <b>Mid-point on L lateral border of anterior epiphysis*</b>                      |
| 6  | <b>Mid-point between 2 and 3*</b>                                                |
| 7  | <b>Mid-point between 3 and 4*</b>                                                |
| 8  | <b>Mid-point between 4 and 5*</b>                                                |
| 9  | <b>Mid-point between 5 and 2*</b>                                                |
| 10 | <b>In anterior view, ventral tip of R chevron anterior articulation facets</b>   |
| 11 | <b>In anterior view, ventral tip of L chevron anterior articulation facets</b>   |
| 12 | Mid-point on the tip of R TP.                                                    |
| 13 | Maximum posterior curve on the extreme of R TP.                                  |
| 14 | In posterior view, mid-point in the intersection between NA and NS.              |
| 15 | Mid-point on dorsal tip of NS                                                    |
| 16 | Maximum posterior curve on the extreme of NS                                     |
| 17 | Maximum posterior curve on the extreme of L TP                                   |
| 18 | Mid-point on the tip of L TP                                                     |
| 19 | Maximum anterior curve on the extreme of L TP                                    |
| 20 | Most anterior point on L metapophysis                                            |
| 21 | Most anterior point on R metapophysis                                            |
| 22 | In anterior view, mid-point in the intersection between NA and NS                |
| 23 | Maximum anterior curve on the extreme of R TP                                    |
| 24 | <u>Center of posterior epiphysis*</u>                                            |
| 25 | <u>Mid-point on dorsal border of posterior epiphysis*</u>                        |
| 26 | <u>Mid-point on R lateral border of posterior epiphysis*</u>                     |
| 27 | <u>Mid-point on ventral border of posterior epiphysis*</u>                       |
| 28 | <u>Mid-point on L lateral border of posterior epiphysis*</u>                     |
| 29 | <u>Mid-point between 25 and 26*</u>                                              |
| 30 | <u>Mid-point between 26 and 27*</u>                                              |
| 31 | <u>Mid-point between 27 and 28*</u>                                              |
| 32 | <u>Mid-point between 28 and 25*</u>                                              |
| 33 | <u>In posterior view, ventral tip of R chevron posterior articulation facets</u> |
| 34 | <u>In posterior view, ventral tip of L chevron posterior articulation facets</u> |

E)

| # | Description |
|---|-------------|
|---|-------------|

- 
- 1 **Center of anterior epiphysis**
  - 2 **Mid-point on dorsal border of anterior epiphysis\***
  - 3 **Mid-point on R lateral border of anterior epiphysis\***
  - 4 **Mid-point on ventral border of anterior epiphysis\***
  - 5 **Mid-point on L lateral border of anterior epiphysis\***
  - 6 **Mid-point between 2 and 3\***
  - 7 **Mid-point between 3 and 4\***
  - 8 **Mid-point between 4 and 5\***
  - 9 **Mid-point between 5 and 2\***
  - 10 **In anterior view, ventral tip of R chevron anterior articulation facets**
  - 11 **In anterior view, ventral tip of L chevron anterior articulation facets**
  - 12 Most anterior point on L metapophysis
  - 13 Most anterior point on R metapophysis
  - 14 In anterior view, mid-point in the intersection between NA and NS.
  - 15 Mid-point on dorsal tip of NS
  - 16 Maximum posterior curve on the extreme of NS
  - 17 In posterior view, mid-point in the intersection between NA and NS
  - 18 Center of posterior epiphysis\*
  - 19 Mid-point on dorsal border of posterior epiphysis\*
  - 20 Mid-point on R lateral border of posterior epiphysis\*
  - 21 Mid-point on ventral border of posterior epiphysis\*
  - 22 Mid-point on L lateral border of posterior epiphysis\*
  - 23 Mid-point between 25 and 26\*
  - 24 Mid-point between 26 and 27\*
  - 25 Mid-point between 27 and 28\*
  - 26 Mid-point between 28 and 25\*
  - 27 In posterior view, ventral tip of R chevron posterior articulation facets
  - 28 In posterior view, ventral tip of L chevron posterior articulation facets
-
